# Supplementary material for: The reliability and validity of the weight-bearing lunge test in a Congenital Talipes Equinovarus population (CTEV)
Source: PeerJ. 2021 Jan 5;9:e10253. doi: 10.7717/peerj.10253 (PMC7792513; doi:10.7717/peerj.10253)
Supplement: Supplemental Information 1 [file peerj-09-10253-s001.xlsx]

## Sheet: Sheet1
			CLINICIAN								CLINICIAN IN TRAINING								PARENT/CARER
			Foot #	Distance from toes to wall (mm)		Angle back of tibia (Inclinometer) degrees		Angle back of tibia (Compass app iPhone) degrees			Foot #	Distance from toes to wall (mm)		Angle back of tibia (Inclinometer) degrees		Angle back of tibia (Compass app iPhone) degrees			Foot #	Distance from toes to wall (mm)		Angle back of tibia (Compass app iPhone) degrees
				A_distance1	A_distance2	A_inc1	A_inc2	A_phone1	A_phone2			G_toes1	G_toes2	G_inc1	G_inc2	G_phone1	G_phone2			carer_distance1	carer_distance2	carer_phone1	carer_phone2
			1	-66	-40	14.9	19.4	17	16		1	-86	-71	15.2	19.4	13	16		1	-26	-22	18	17
			2	-13	-30	24.1	29.6	21	11		2	-33	-29	31.1	28.8	30	25		2	-22	-28	24	25
			3	-13	-10	23.5	26.2	20	23		3	13	0	23.3	22.8	22	21		3	0	5	20	24
			4	8	10	26.7	27.5	29	27		4	0	0	25.7	27.5	25	28		4	0	0	26	28
			5	19	19	25.4	23.9	21	24		5	8	12	19	20.7	23	20		5	7	21	21	24
			6	-10	-11	21.9	23.8	20	26		6	-19	-18	23.5	22.4	23	22		6	0	-3	24	23
			7	0	6	22.1	19.8	23	25		7	0	0	23.4	24	24	25		7	6	6	18	20
			8	0	0	22.5	26	25	27		8	-8	0	25.5	23	26	24		8	6	15	26	28
			9	-10	-1	19.3	20.6	23	17		9	-24	-16	18.8	19.1	18	18		9	-10	-12	15	18
			10	35	32	27.2	27.1	27	26		10	45	40	28.1	28.2	30	28		10	51	66	30	33
			11	11	17	16.1	17.1	17	16		11	28	23	19.5	24.3	21	19		11	24	35	18	24
			12	38	29	27.7	27.2	26	25		12	25	27	25.5	27.8	25	26		12	35	50	26	29
			13	9	16	22.9	25.6	25	24		13	15	22	23.7	26	22	26		13	25	19	27	24

## Sheet: Sheet2
	AM - Auburn	GG - Georgia	PC - parents/carers
INTRA-RATER RELIABILITIES
Measure	Rater	Mean (SD)	ICC	95% CI	SEM	MDC
Digital inclinometer	AM	-1.5 (2.3)	0.87	0.52, 0.96	0.829277	2.29864
	GG	0.9 (2.2)	0.9	0.68, 0.97	0.695701	1.92839
iPhone	AM	-0.5 (4.1)	0.75	0.16, 0.92	2.05	5.68231
	GG	0.3 (2.6)	0.9	0.68, 0.97	0.822192	2.279
	PC	-1.8 (2.4)	0.9	0.49, 0.97	0.758947	2.10369
Distance	AM	-2.2 (10)	0.96	0.86, 0.99	2	5.54372
	GG	-2 (7.1)	0.98	0.96, 0.99	1.00409	2.7832
	PC	0.43 (7.8)	0.97	0.88, 0.99	1.351	3.74478
INTER-RATER RELIABILITIES
Measure	Raters	Mean (SD)	ICC	95% CI
Digital inclinometer	AM/GG	-0.01 (2.9)
iPhone	AM/GG	-0.9 (4.6)
Distance	AM/GG	3.6 (11.1)
CRITERION VALIDITY
Measure	Raters	Mean (SD)	ICC	95% CI
iPhone	AM/PC	-2.3 (4.9)	0.62	-0.11, 0.88
Distance	AM/PC	-8.8 (12.8)	0.89	0.58, 0.97
Age (years)	7	#DIV/0!		5	10
Weight (kg)	22.9		15	39
Height (cm)	121.9		102	147.5
Shin length (cm)	28.2		21	35
Foot length (cm)	16.6		14	21.5
Pirani score (from birth)	5			6	3
